# Supplementary material for: The effects of oxygen flow ratio on the properties of Ag x O thin films grown by radio frequency magnetron sputtering
Source: Royal Society of Chemistry journal article supplement (doi:10.1039/d4ra02039a), 2024-01-01
Supplement: d4ra02039a1.pdf [file d4ra02039a1.pdf]

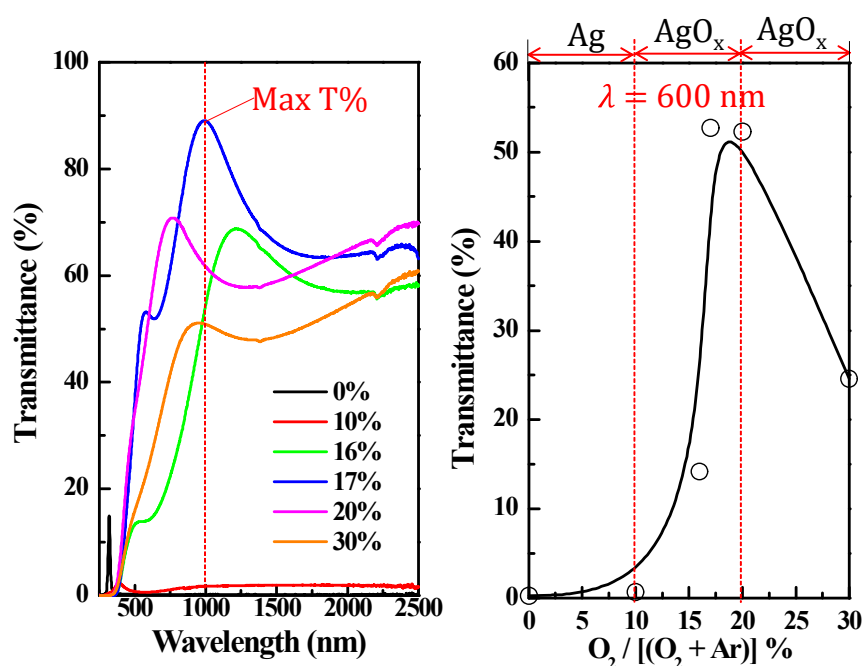

Fig. 1 Optical transmittance and the transmittance of 150 nm samples at a wavelength of 600nm are plotted as a function of  $O_2$  flow ratio.

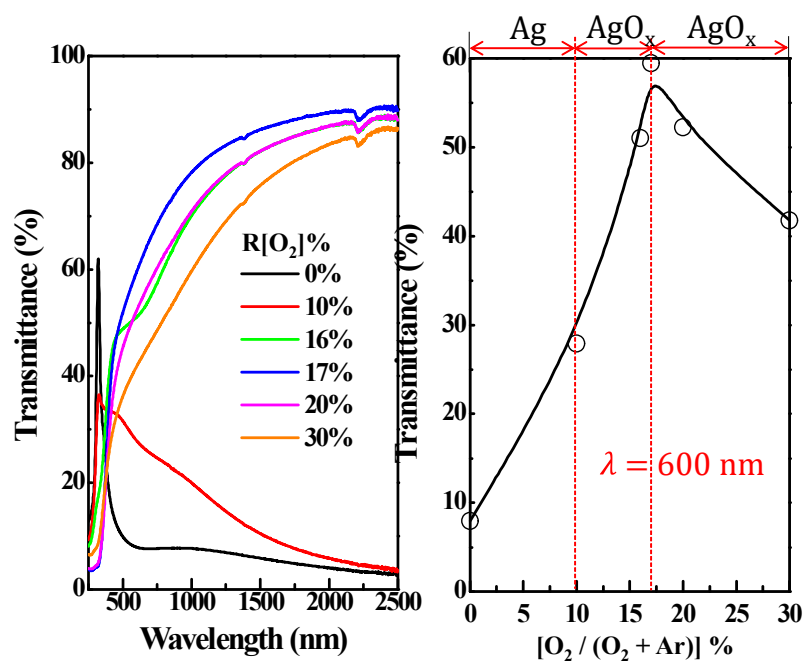

Fig.2 Optical transmittance and the transmittance of 50 nm samples at a wavelength of 600nm are plotted as a function of  $O_2$  flow ratio.
